# Supplementary material for: Assembly with copper(ii) ions and D–π–A molecules on a graphene surface for ultra-fast acetic acid sensing at room temperature
Source: Royal Society of Chemistry journal article supplement (doi:10.1039/c9ra05706d), 2019-01-01
Supplement: c9ra05706d1.pdf [file c9ra05706d1.pdf]

## *Supplementary Information*

# Assembly with Copper (II) Ion and D- $\pi$ -A Molecule on Graphene Surface for Ultra-fast Acetic Acid Sensing at Room Temperature

YeLei Gong<sup>1,#</sup>, Hao Li<sup>1,#</sup>, Wenle Pei<sup>2</sup>, Jincheng Fan<sup>1</sup>, Ahmad Umar<sup>3</sup>, M. S. Al-Assiri<sup>3,4</sup>,

Yao Wang<sup>1,\*</sup>, Nicolaas Frans de Rooij<sup>1</sup> and Guofu Zhou<sup>1</sup>

<sup>1</sup> Guangdong Provincial Key Laboratory of Optical Information Materials and Technology , Institute of Electronic Paper Displays, South China Academy of Advanced Optoelectronics, South China Normal University, Guangzhou 510006, P. R. China.

<sup>2</sup> Key Laboratory of Bio-Inspired Smart Interfacial Science and Technology of Ministry of Education, School of Chemistry, Beihang University, Beijing 100191, P. R. China.

<sup>3</sup>Promising Centre for Sensors and Electronic Devices, Najran University, Najran 11001, Kingdom of Saudi Arabia.

<sup>4</sup>Department of Chemistry, Faculty of Science and Arts, Najran University, Najran-11001, Saudi Arabia.

# *These authors contributed equally.*

\* *Corresponding Author: Yao Wang, Email: [wangyao@m.scnu.edu.cn](mailto:wangyao@m.scnu.edu.cn)*

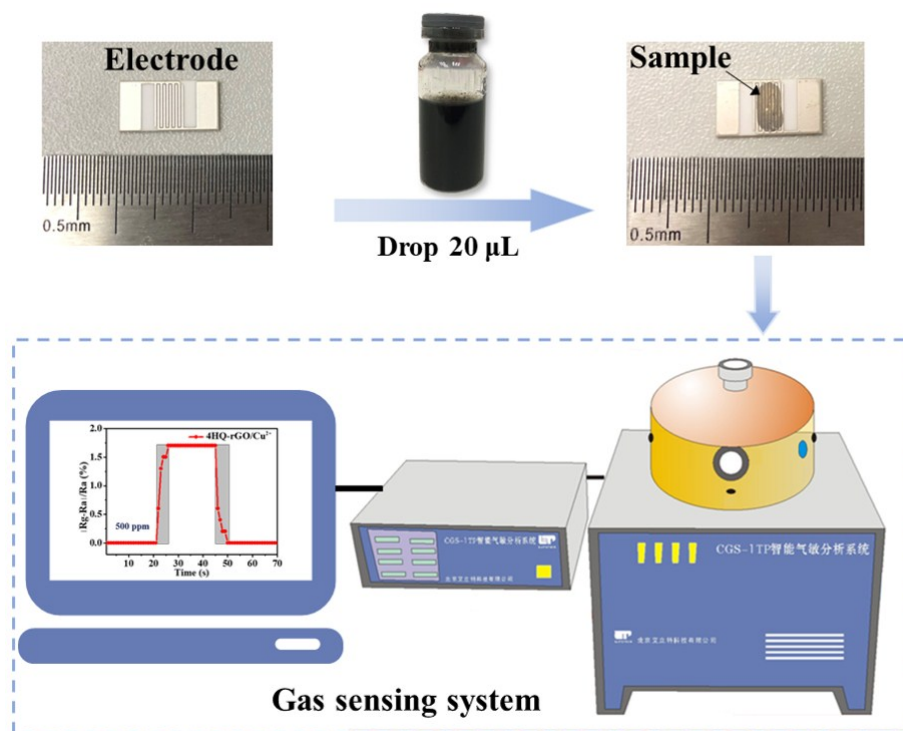

**Figure S1.** A schematic of gas sensing measurement.

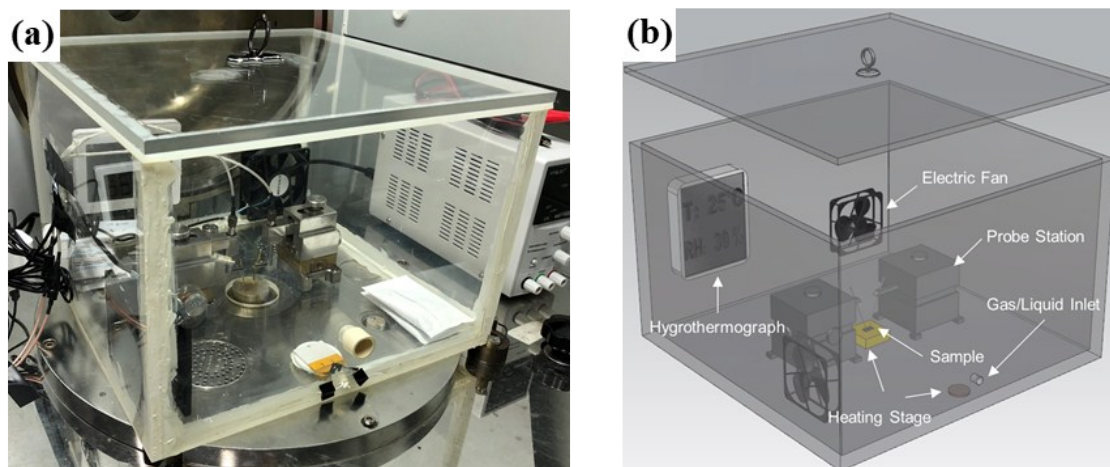

**Figure S2.** (a) Digital photograph &(b) schematic of an improved gas sensing measurement chamber.

As shown in Figure S2, in order to further precisely control the humidity inside the measurement chamber, we have decorated the gas sensitivity testing chamber by adding humidity-controlled devices. Controlling the humidity in the chamber can be

achieved by adding desiccant or water. The value of real-time humidity can be read by the hygrometer in the chamber. The volume of the chamber is 17 liters. For each sample, we performed gas sensitivity tests at least three times. For each test, we changed different humidity conditions (RH=30%, 50%, 80%) to get the stable response (response changed within 5%).

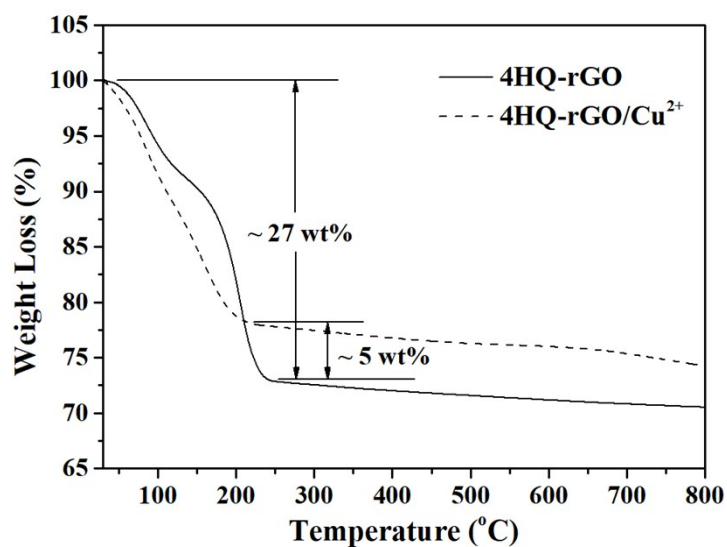

**Figure S3.** TGA curves of 4HQ/rGO and 4HQ-rGO/Cu<sup>2+</sup> composites.

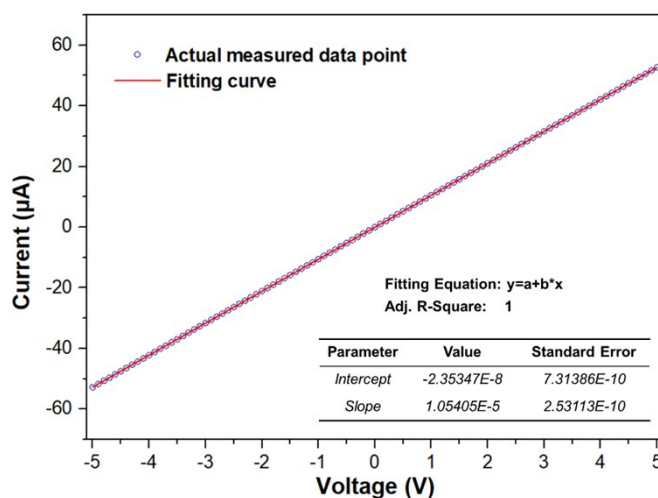

**Figure S4.**  $I-V$  characteristics of the 4HQ-rGO/Cu<sup>2+</sup> based sensors.

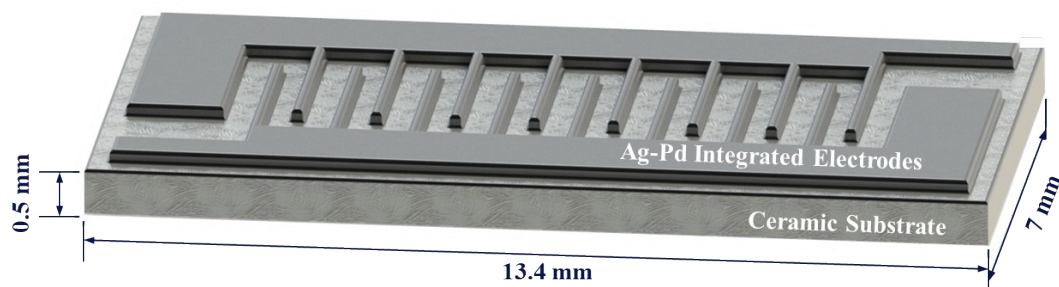

**Figure S5.** Schematic diagram of interdigital electrode.

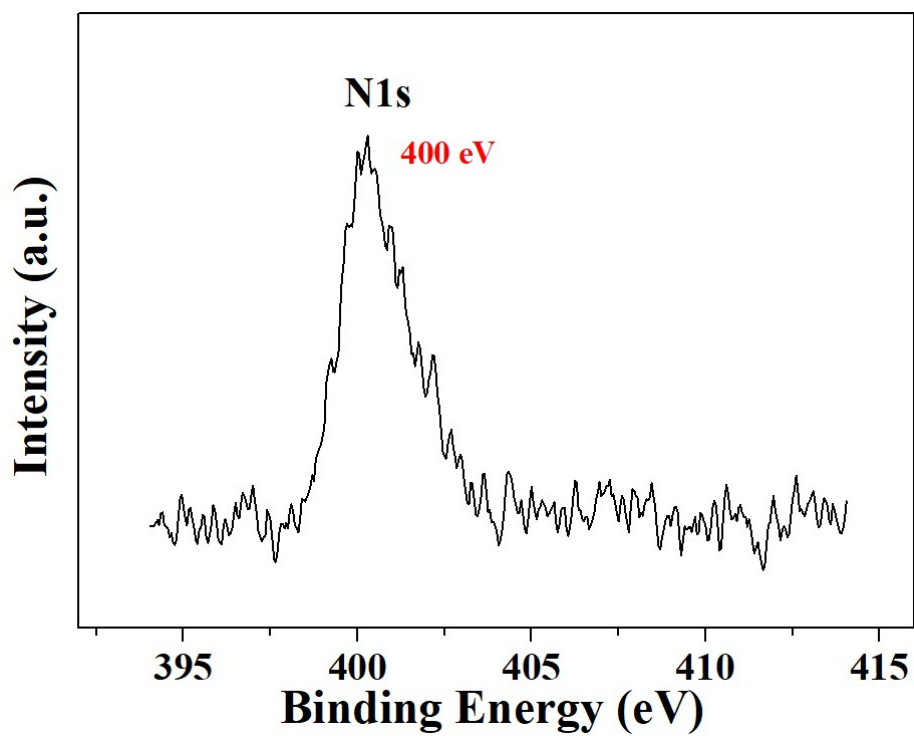

**Figure S6.** Typical XPS survey scan spectrum of N1s of 4HQ-rGO/Cu<sup>2+</sup>.
